# Supplementary material for: A Simple and Specific Noncompetitive ELISA Method for HT-2 Toxin Detection
Source: PubMed Central journal article supplement (PMC5408219; doi:10.3390/toxins9040145), 2017-04-20
Supplement: toxins-09-00145-s001.pdf [file toxins-09-00145-s001.pdf]

# Supplementary Materials: A Simple and Specific Noncompetitive ELISA Method for HT-2 toxin Detection

Henri O. Arola, Antti Tullila, Alexis V. Nathanail, Tarja K. Nevanen

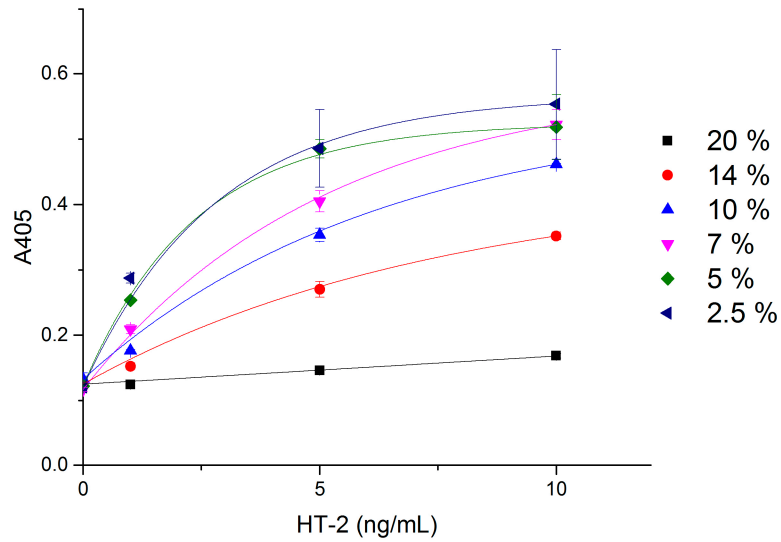

Figure S1. Noncompetitive HT-2 toxin ELISA: Effect of MeOH to the assay performance.

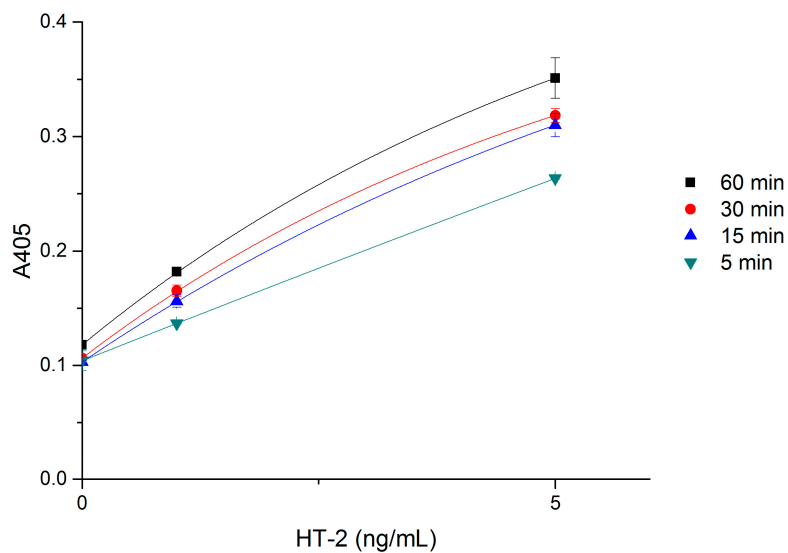

Figure S2. Noncompetitive HT-2 toxin ELISA: Effect of sample incubation time on the assay response with spiked 7% MeOH-water.

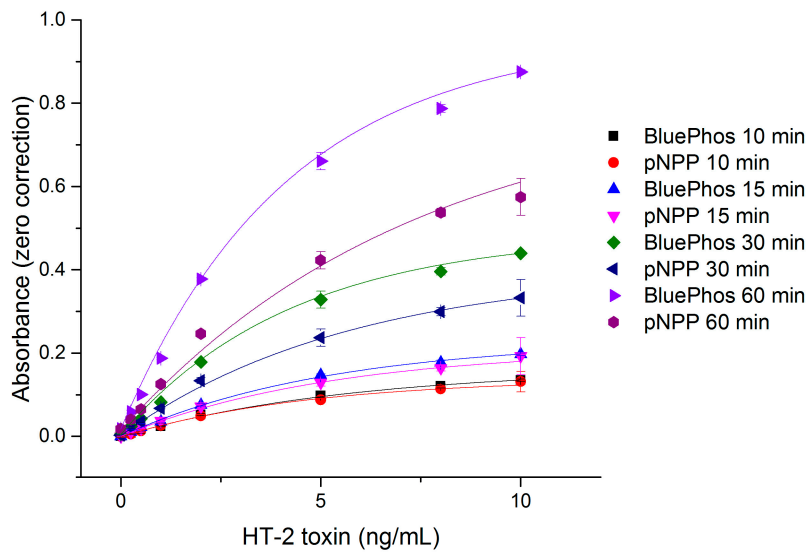

**Figure S3.** Noncompetitive HT-2 toxin ELISA: Comparison of two colorimetric substrates for alkaline phosphatase in 7% MeOH-PBS.
